# Supplementary material
Source: PubMed Central journal article supplement (PMC11687586)

1067 **Supplemental Figure 1: PCH-2 does not regulate GFP::MSH-5 loading and removal through**  
1068 **HTP-3. A.** Representative images of nuclei in different stages of meiotic prophase in *htp-3<sup>H96Y</sup>* and  
1069 *pch-2; htp-3<sup>H96Y</sup>* mutants stained for DAPI (magenta) and GFP::MSH-5 (green) Scale bar in all images  
1070 is 5  $\mu$ m. **B.** Scatter plot showing average GFP::MSH-5 foci per row of germline nuclei in *htp-3<sup>H96Y</sup>*  
1071 (blue, 132 nuclei) and *pch-2; htp-3<sup>H96Y</sup>* (green, 161 nuclei) mutants from the transition zone to late  
1072 pachytene, normalized to 100. The line represents a rolling average of four rows. Similar data is  
1073 provided for a control germline (opaque yellow, 163 nuclei) for comparison  
1074

1075 **Supplemental Figure 2: *pch-2* meiotic nuclei with elevated numbers of GFP::*MSH-5* foci show**  
1076 **defects in crossover assurance.** Gray scale images of control and *pch-2* mutant nuclei stained for  
1077 DAPI, GFP::*MSH-5* and OLLAS::*COSA-1*. Scale bar in image is 4  $\mu$ m.

1078

1079 **Supplemental Figure 3: *syp-1<sup>T452A</sup>* and *pch-2;syp-1<sup>T452A</sup>* mutants display a similar defect in**  
1080 **meiotic progression. A.** Representative images of *syp-1<sup>T452A</sup>* and *pch-2;syp-1<sup>T452A</sup>* mutant germlines.  
1081 Encircled nuclei indicate transition zone nuclei. Scale bar indicates 10  $\mu$ m. **B.** Quantification of fraction  
1082 of rows of transition zone nuclei in 3 germlines in *syp-1<sup>T452A</sup>* (maroon) and *pch-2;syp-1<sup>T452A</sup>* (light blue)  
1083 mutants.

1084

1085

1086

**Supplementary Table 1: Single nucleotide polymorphisms used for recombination assay**

| Chromosome and SNP | Primer Name | Primer Genetic Location | Primer Sequence FOR                | Primer Sequence REV            | Restriction enzyme | N2                       | HI                               |
|--------------------|-------------|-------------------------|------------------------------------|--------------------------------|--------------------|--------------------------|----------------------------------|
| IA                 | F56C11      | -19                     | ATGCCAG<br>TGATAAG<br>GAACGG       | TCACATCC<br>CTTGTCGA<br>TGAA   | DraI               | 354,<br>146              | 500                              |
| IB                 | Y71G12      | -12.3                   | GACAATG<br>ACCAATA<br>AGACG        | GATCCGT<br>GAAATTGT<br>TCCG    | BsrI               | 440,<br>125              | 364,<br>125,<br>76               |
| IC                 | K04F10      | 0.9                     | ATCATTCT<br>CCAGGCC<br>ACGTTAC     | CTGAACTA<br>GTGGAAC<br>AAACCCC | NdeI               | 594                      | 300,<br>294                      |
| ID                 | T07D10      | 13.6                    | CTTGGTG<br>TGGGGA<br>GAGTATA<br>GG | TTTGTCCG<br>GATTGACT<br>CTGC   | Sau3AI             | 303,<br>63               | 207,<br>96,<br>63                |
| IE                 | ZK909       | 28.8                    | CACAAGT<br>GGTTTGG<br>AAGTACC<br>G | CAACAAAG<br>GGATAGAT<br>CACGGG | HindIII            | 450                      | 236,<br>214                      |
| IIIA               | pkP3081     | -26.98                  | AGCAAGA<br>ATGAGCC<br>GATTG        | GTCGGCC<br>GTTTTCAA<br>ATAACTG | TaqI               | 222,<br>149              | 195,<br>145,<br>27               |
| IIIB               | pkP3095     | -5.12                   | TCTCGTC<br>AATTGTC<br>GCCTG        | TTATTTGC<br>AATCCAAC<br>GGC    | ApoI               | 308                      | 168,<br>140                      |
| IIIC               | pkP3101     | -0.9                    | CCAAGTG<br>CAAATA<br>TGGTGC        | ATAAACAA<br>TTTCAGTG<br>CCGC   | HinfI              | 495                      | 282,<br>213                      |
| IIID               | pkP3035     | 0.9                     | CGTAAAC<br>TACCAA<br>CTCGGTG       | GGTCTACT<br>ACAACAT<br>ACAGGC  | Eco0109I           | 732                      | 419,<br>313                      |
| IIIE               | pkP3080     | 21.29                   | CGGTGGT<br>GGTAAAA<br>GTGTAAC      | CAACATTC<br>AGGCTGT<br>GCTTTCC | Hpy188III          | 365,<br>76,<br>68,<br>35 | 241,<br>124,<br>76,<br>68,<br>35 |
| IVA                | F56B3       | -24                     | TGATGGT<br>GTGTCTG<br>CGTACC       | AGAGCTG<br>GAGAGCA<br>CGGATA   | DraI               | 301,<br>128,<br>71       | 429,<br>71                       |
| IVB                | F52C12      | -14.9                   | ACATTTA<br>GTCACGC<br>GTAGGG       | GCCCGAA<br>TCTAGCAC<br>ATAAG   | HpaII              | 191,<br>137,<br>22       | 328,<br>22                       |
| IVC                | B0273       | 1.8                     | AATACAG<br>CAGTCGT<br>TCCGTTT      | TGAACTTC<br>ATGAACCA<br>GCTTG  | DraI               | 288,<br>144              | 432                              |

|     |         |        |                                    |                                |         |                    |                           |
|-----|---------|--------|------------------------------------|--------------------------------|---------|--------------------|---------------------------|
| IVD | K10D11  | 6.7    | GATTATTT<br>CAGAGGA<br>GCAGAGC     | CATAGCAC<br>GTGGAATA<br>ACCAC  | HindIII | 420                | 245,<br>175               |
| IVE | T02D1   | 16.8   | TGCTTAA<br>AGTCATC<br>GTGTCCA<br>C | TGTAAACC<br>GTATCGAA<br>TCCGAC | EcoRI   | 174,<br>235        | 408                       |
| XA  | pkP6139 | -19.97 | AAGAGTG<br>AACCTTT<br>TCCGTGA<br>G | TGATGCAA<br>TTTATACA<br>CACGCC | MseI    | 401,<br>31         | 279,<br>122,<br>31        |
| XB  | pkP6120 | -10.46 | TCGTGGC<br>ACCATAA<br>AAGTG        | GATTCAGA<br>TCAAACAG<br>AGGTGG | DraI    | 243                | 128,<br>115               |
| XC  | pkP6157 | -0.14  | GGGGTAT<br>AATGAAC<br>CAACCTG      | TGTAGGAA<br>CCGTTTGT<br>TTCTTC | ApoI    | 261,<br>48         | 150,<br>111,<br>48        |
| XD  | pkP6161 | 9.38   | ATCGACC<br>CCAACAA<br>TGAC         | TCCGTCAT<br>CCAAATCT<br>CCG    | AseI    | 542                | 287,<br>255               |
| XE  | pkP6170 | 24.07  | CGCTGTC<br>ACAATCT<br>CTAAAAT<br>G | AAACCCTC<br>CCCACCTT<br>GTTGTC | ApoI    | 249,<br>118,<br>56 | 197,<br>118,<br>56,<br>52 |

A

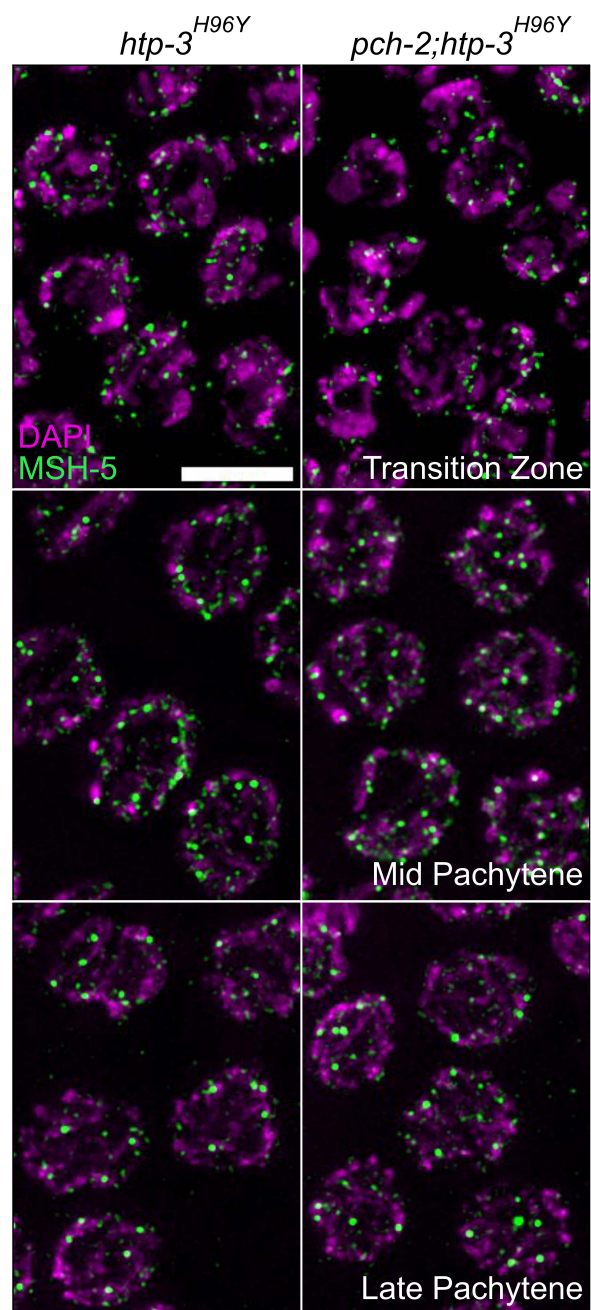

B

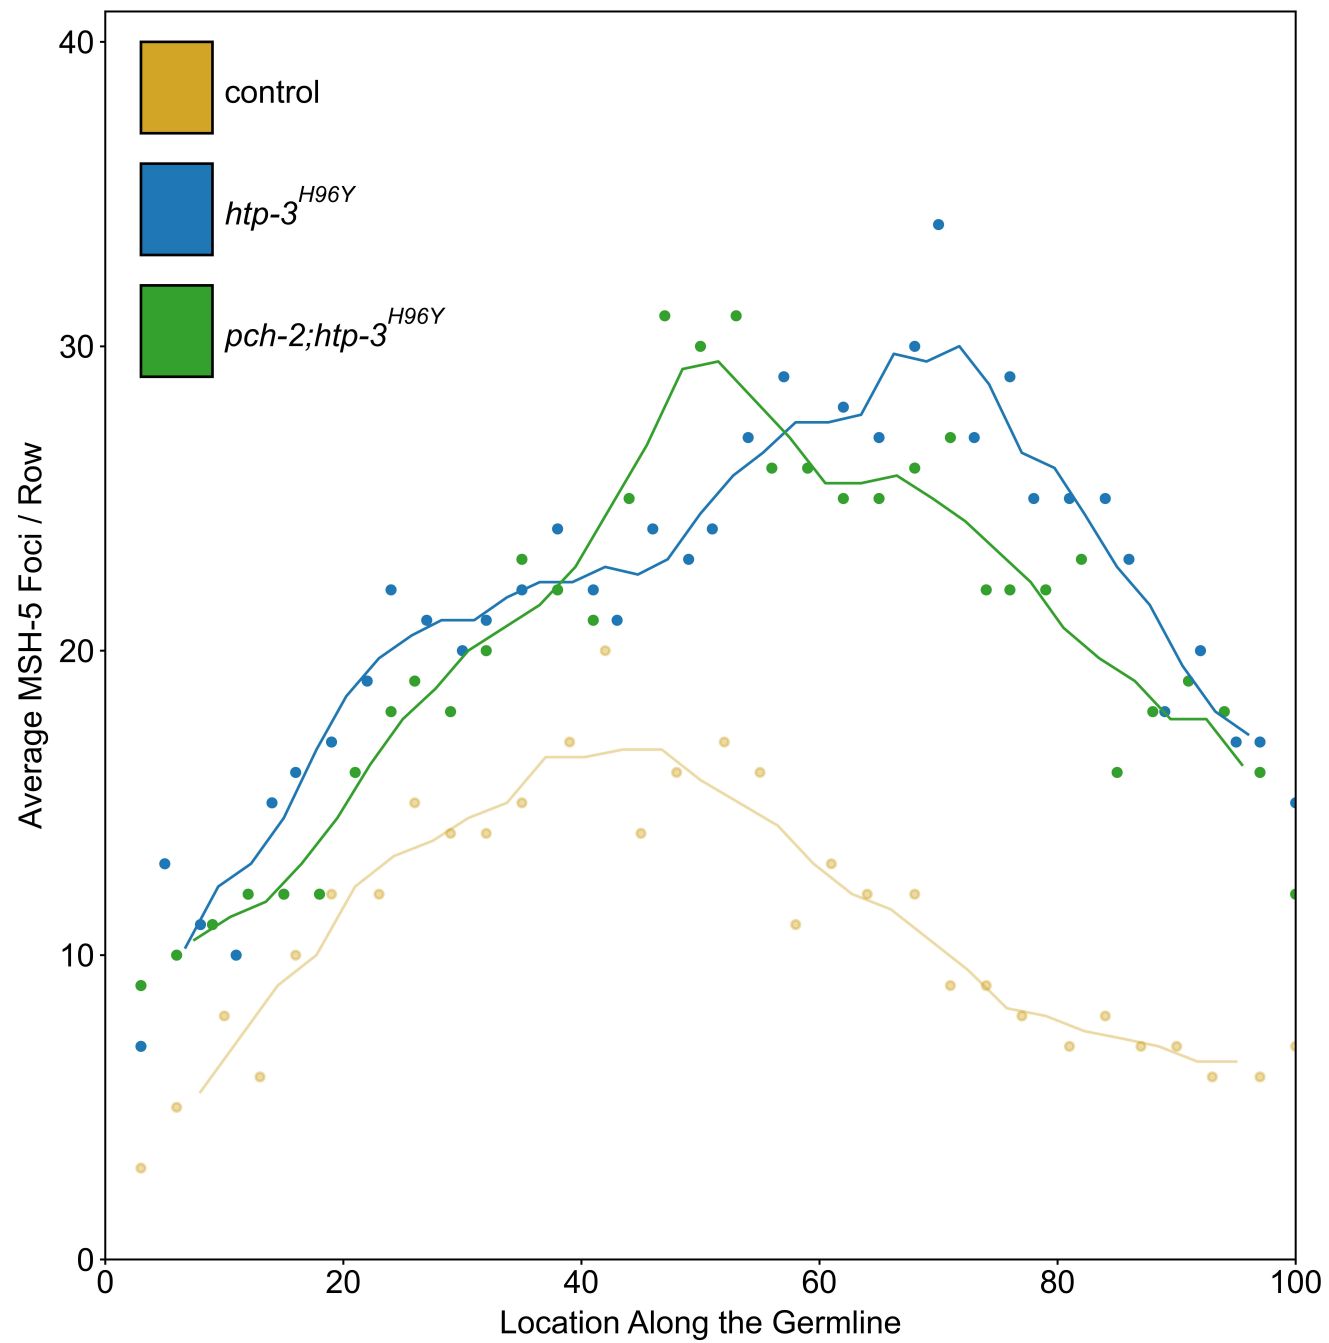

A

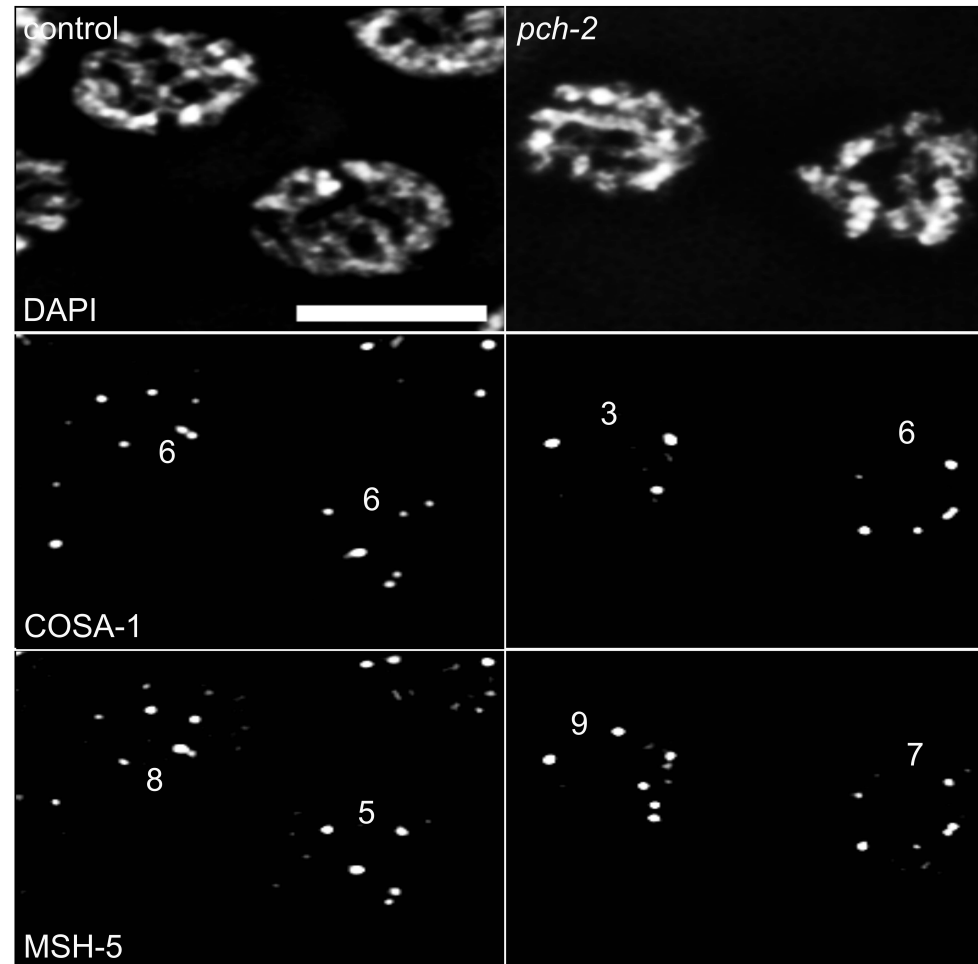

A

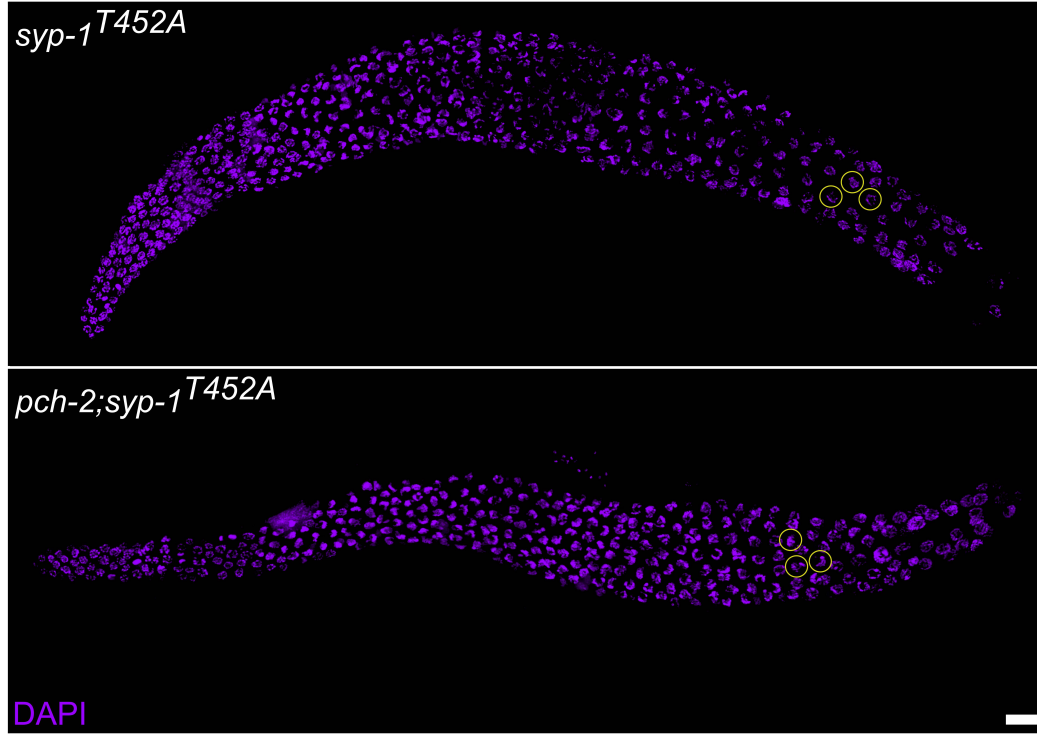

B

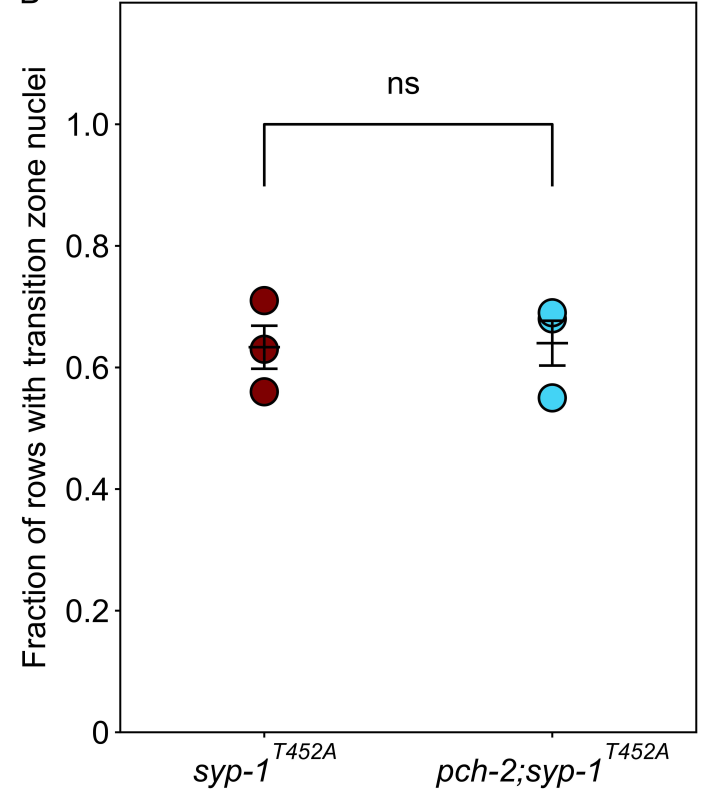

Supplement: NIHPP2024.08.13.607819V2-supplement-1.pdf [file NIHPP2024.08.13.607819V2-supplement-1.pdf]
